# Supplementary material
Source: PubMed Central journal article supplement (PMC2745831)
Supplement: NIHMS123823-supplement-Fig_Legend-Suppl_Fig.pdf [file NIHMS123823-supplement-Fig_Legend-Suppl_Fig.pdf]

### Figure legend for Supplementary Figure

Photomicroimages show MMP-9 (green, left) was colocalized with MPO positive neutrophils (red, middle). Right photo shows merged image of left and middle photos. Scale bar = 20  $\mu\text{m}$ .
